# Supplementary material for: Mediating the carbon black–natural rubber interface with thioamide-functionalized polysulfide for energy-saving composites
Source: Royal Society of Chemistry journal article supplement (doi:10.1039/d5ta04129e), 2025-01-01
Supplement: d5ta04129e1.pdf [file d5ta04129e1.pdf]

# Mediating Carbon Black-Natural Rubber Interface by Thioamide-Functionalized Polysulfide for Energy-Saving Composites

Ruoyan Huang,<sup>a</sup> Dong Wang,<sup>a</sup> Zhenghai Tang,<sup>\*a</sup> Baochun Guo<sup>\*a</sup> and Liqun Zhang<sup>\*a, b, c</sup>

<sup>a</sup> Institute of Emergent Elastomers, Guangdong Basic Research Center of Excellence for Energy & Information Polymer Materials, School of Materials Science and Engineering, South China University of Technology, Guangzhou 510640, China

<sup>b</sup> College of Materials Science and Engineering, Beijing University of Chemical Technology, Beijing 100029, China

<sup>c</sup> School of Chemical Engineering and Technology, Xi'an Jiaotong University, Xian 710049, China

## EXPERIMENTAL SECTION

### Materials

Natural rubber (NR, grade 3L) was purchased from Yunnan, China. Carbon black (CB, grade N330) was purchased from Cabot Chemical Co. Ltd., China. 2-(1-cyclohexenyl) ethylamine (CA) was purchased from Bide Pharmatech Co. Ltd., Shanghai, China. Sulfur (S<sub>8</sub>, 98%) was purchased from Macklin Biochemical Co. Ltd., Shanghai, China. Rubber additives were industrial grade and used as received.

### Synthesis of Thioamide-Functionalized Polysulfide (SCA)

SCA was synthesized via inverse vulcanization of S<sub>8</sub> with CA. Briefly, S<sub>8</sub> was melted at 130 °C in a three-necked flask under an argon atmosphere. Upon complete liquefaction, a pre-determined amount of CA was added under stirring. The reaction was terminated when the C=C bond in CA was disappeared as detected by <sup>1</sup>H NMR measurement. The product was dissolved in tetrahydrofuran, followed by filtration to remove unreacted S<sub>8</sub>. The solvent was then evaporated to produce SCA. In the context, the mass feeding ratio of S<sub>8</sub> and CA is 7:3, 5:5, and 3:7, which are denoted as S<sub>7</sub>CA<sub>3</sub>, S<sub>5</sub>CA<sub>5</sub>, and S<sub>3</sub>CA<sub>7</sub>, respectively. The yields of S<sub>3</sub>CA<sub>7</sub>, S<sub>5</sub>CA<sub>5</sub>, and S<sub>7</sub>CA<sub>3</sub> are 36%, 61%, and 52% respectively.

### Preparation of SCA-Modified CB Model Compound (mCB)

To clarify the interaction between CB and SCA, a model compound was prepared. 10.0 g of CB and 0.5 g of S<sub>5</sub>CA<sub>5</sub> were thoroughly mixed in 100 mL of tetrahydrofuran under stirring, followed by the evaporation of solvent. The mixture was then treated at 150 °C for 1 h to initiate the reaction between S<sub>5</sub>CA<sub>5</sub> and CB. Finally, the mixture underwent Soxhlet extraction with tetrahydrofuran for 72 h to remove un-grafted S<sub>5</sub>CA<sub>5</sub>.

### Preparation of Composites

NR, antioxidant, CB, and SCA were sequentially incorporated into a Banbury mixer and blended at room temperature for 7 min. Then the temperature was elevated to 150 °C, and the mixture was further mixed for an additional 2 min. After cooling to room temperature, the mixture was mixed with activators, accelerators, and sulfur on an open two-roll mill. After 24 h of aging at room temperature, the resultant compound was molded at 143 °C for the optimal curing time measured by vulcameter to produce vulcanizate composite. In the context, the abbreviation of NR/SCA- $\gamma$  designates the composite modified with  $\gamma$  phr of SCA.

A control composite NR/Blank without adding SCA was prepared under the same procedures. Detailed formulations are provided in **Table S1**.

### Characterizations

<sup>1</sup>H NMR spectra were recorded on a Bruker AVANCE III HD 600 instrument. The samples were dissolved in CDCl<sub>3</sub>, and TMS was used as an internal standard. FTIR spectra were collected on a Bruker Vertex 70 PTIR spectrometer. X-ray photoelectron spectroscopy (XPS) analysis was performed on an Escalab Xi+ equipped with an Al K $\alpha$  radiation source. Thermal gravimetric analysis (TGA) was performed on a TA Q50 thermogravimetric analyzer under nitrogen atmosphere at a 10 °C/min heating rate. Morphologies of the composites were observed by a JEM-2100F transmission electron microscopy (TEM) and a Hitachi SU-70 scanning electron microscopy (SEM). Ultrasmall-angle X-ray scattering (USAXS) experiments were conducted on Beamline BL10U1, respectively, at Shanghai Synchrotron Radiation Facility, China. For freezing point measurements, the composites were soaked in cyclohexane for 72 h, and then the swollen samples were cooled from 40 to -50 °C at 5 °C/min using a TA DSC Q200 instrument. Element analysis was performed on a Vario EL cube. Dynamic rheological behaviors of the composites were measured using RPA 2000 analyzer (Alpha) with strain from 0.1 to 20% under 1 Hz at 60 °C. Heat build-up of the composites was tested on a U-CAN UD-3801 Flexometer based on ISO 4666-3:2016. Uniaxial tensile tests were performed using a Gotech AI-7000 S universal testing machine following ISO 37-2005. Rolling resistance of rubber wheels was measured on an RSS-II model rolling resistance testing machine (Beijing Wanhuiyifang Technology Co., Ltd.). The load and rotation speed were 30 kg and 1200 r/min, respectively. X-ray diffraction (XRD) patterns were measured by an X-ray diffractometer (PANalytical, Netherlands). Dynamic mechanical analysis (DMA) was performed on a NETZSCH DMA 242 apparatus, and the samples were heated from 0 to 80 °C at 3 °C/min under 10 Hz frequency and 5%

dynamic strain. Crosslink density was determined based on equilibrium swelling tests by immersing the vulcanizates in toluene, as described elsewhere.<sup>1</sup>

Grafting Efficiency of SCA onto CB is determined using the following formula:

$$\text{Grafting efficiency} = \frac{W_2 - W_1}{W_3 - W_1} * \frac{m_{CB}}{m_{SCA}} * 100\%$$

where  $W_1$ ,  $W_2$ ,  $W_3$  are the mass loss between 30 and 500 °C for CB, mCB and SCA, respectively, and  $m_{CB}$  and  $m_{SCA}$  are the feed masses of CB (10.0 g) and SCA(0.5 g) in the preparation of model compound mCB, respectively.

Bound rubber was determined by extracting the uncured compounds with toluene for 72 h at 25 °C, and the solvent was renewed each 24 h. The remnants were dried overnight in vacuum and subjected to TGA measurement. The bound rubber was calculated as follows:

$$\text{Bound rubber} = \frac{W(\text{loss})}{1 - W(\text{loss})} \times z$$

where  $W(\text{loss})$  is the weight loss of the remnants,  $z$  represents the weight fraction of CB relative to NR.

Noda's rules are summarized as follows:<sup>2</sup>

$\Phi(v_1, v_2)$  and  $\Psi(v_1, v_2)$  represent the correlation peaks in synchronous and asynchronous map, respectively.

- (1) If  $\Phi(v_1, v_2)$  and  $\Psi(v_1, v_2)$  are simultaneously positive or negative, then the movement of  $v_1$  is before than that of  $v_2$ .
- (2) If  $\Phi(v_1, v_2)$  and  $\Psi(v_1, v_2)$  are one positive one negative, then the movement of  $v_1$  is after than that of  $v_2$ .
- (3) If  $\Phi(v_1, v_2)$  is not equal to 0 but  $\Psi(v_1, v_2)$  is equal to 0, then the movements of  $v_1$  and  $v_2$  are simultaneous.

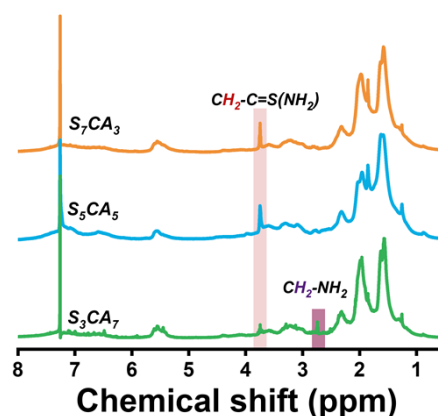

Figure S1 <sup>1</sup>H NMR spectra of  $S_7CA_3$ ,  $S_5CA_5$ , and  $S_3CA_7$ .

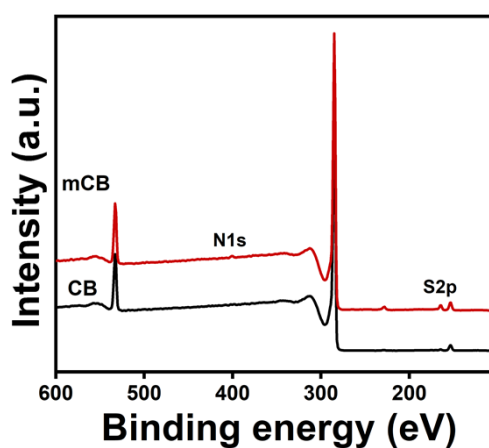

Figure S2 XPS spectra full spectra of CB and mCB.

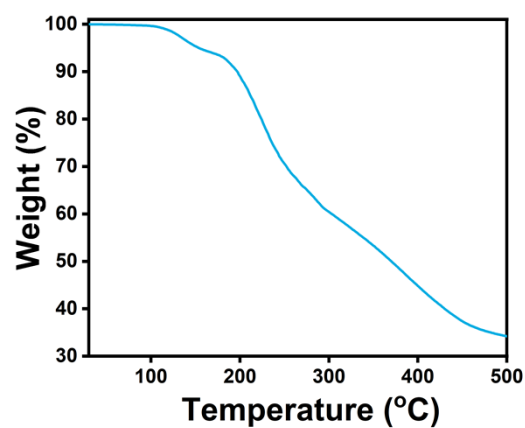

Figure S3 TGA curve of S<sub>5</sub>CA<sub>5</sub>.

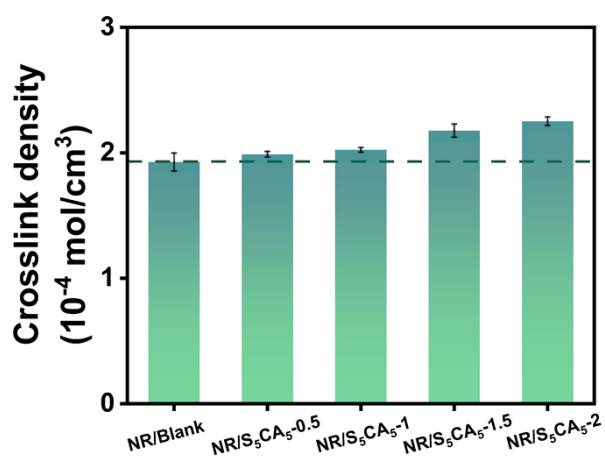

Figure S4 Crosslink density of NR/Blank and NR/S<sub>5</sub>CA<sub>5</sub>-y composites.

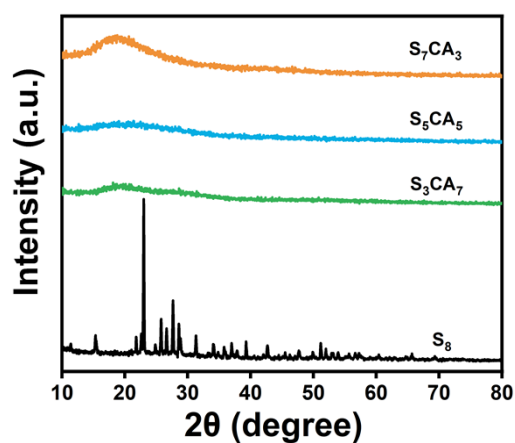

Figure S5 X-ray diffraction patterns of S<sub>3</sub>CA<sub>7</sub>, S<sub>5</sub>CA<sub>5</sub>, S<sub>7</sub>CA<sub>3</sub>, and S<sub>8</sub>.

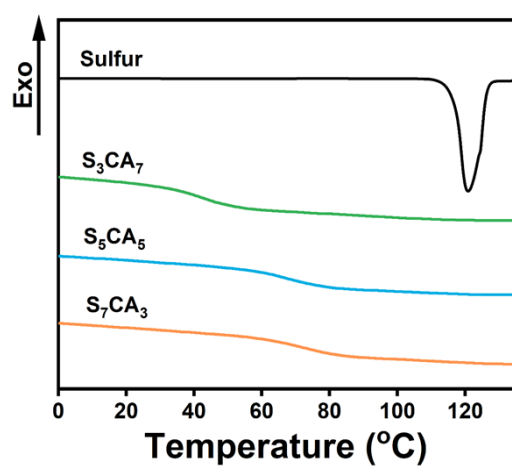

**Figure S6** DSC curves of  $S_3CA_7$ ,  $S_5CA_5$ ,  $S_7CA_3$ , and  $S_8$ .

**Table S1** Formulations of the composites (the unit is gram).

| Ingredient                        | NR  | CB | SCA         |
|-----------------------------------|-----|----|-------------|
| NR/Blank                          | 100 | 40 | 0           |
| NR/S <sub>5</sub> CA <sub>5</sub> | 100 | 40 | 0.5/1/1.5/2 |
| NR/S <sub>3</sub> CA <sub>7</sub> | 100 | 40 | 1.5         |
| NR/S <sub>7</sub> CA <sub>3</sub> | 100 | 40 | 1.5         |

Basic formula is as follows: Antioxidant N-isopropyl-N-(1,3-dimethylbutyl)-N'-phenyl-1,4-phenylenediamin 1 g; Activator zinc oxide 5 g; Activator stearic acid 1 g; Accelerator N-cyclohexylbenzothiazole-2-sulphenamide 1.5 g; Accelerator 2, 2'-dibenzothiazoledisulfide 0.5 g; S<sub>8</sub> 1.5 g.

**Table S2** Mechanical properties of all the composites.

| Samples                                | Tensile strength (MPa) | Breaking strain (%) | Modulus (MPa) |
|----------------------------------------|------------------------|---------------------|---------------|
| NR/Blank                               | 31.3±1.2               | 504±13              | 14.9±0.3      |
| NR/S <sub>5</sub> CA <sub>5</sub> -0.5 | 32.6±2.8               | 522±33              | 15.0±0.4      |
| NR/S <sub>5</sub> CA <sub>5</sub> -1   | 34.0±1.5               | 533±14              | 15.2±0.3      |
| NR/S <sub>5</sub> CA <sub>5</sub> -1.5 | 32.7±0.7               | 502±9               | 15.9±0.3      |
| NR/S <sub>5</sub> CA <sub>5</sub> -2   | 32.9±2.1               | 493±25              | 16.8±0.3      |
| NR/S <sub>3</sub> CA <sub>7</sub> -1.5 | 32.7±0.9               | 532±12              | 15.0±0.3      |
| NR/S <sub>7</sub> CA <sub>3</sub> -1.5 | 32.2±0.6               | 471±20              | 18.1±0.3      |

**Table S3** Comparison on the reduction in hysteresis loss and heat build-up of NR/CB composites modified with IMs.

| CB content and type              | IM content | Hysteresis loss decrease in percentage | Heat build-up decrease in percentage | IM molecular structure                                                                 |
|----------------------------------|------------|----------------------------------------|--------------------------------------|----------------------------------------------------------------------------------------|
| 40 phr CB (N330)                 | 2 phr      | 33 %                                   | 32 %                                 | 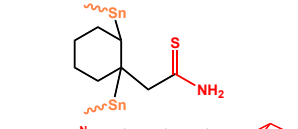    |
| 50 phr CB (N330) <sup>3</sup>    | 1 phr      | 25 %                                   | 24%                                  |     |
| 50 phr CB (N330) <sup>4</sup>    | 2 phr      | 37 %                                   | 29 %                                 |     |
| 45 phr CB (N330) <sup>5</sup>    | 1 phr      | 25 %                                   | /                                    | a   |
| 45 phr CB (N330) <sup>5</sup>    | 1 phr      | 25 %                                   | /                                    | b   |
| 40 phr recovered CB <sup>6</sup> | 2 phr      | 23 %                                   | /                                    | b  |
| 50 phr CB (N234) <sup>7</sup>    | 3 phr      | ~12 %                                  | 7 %                                  |   |
| 50 phr CB <sup>8</sup>           | 4 phr      | ~27 %                                  | ~6 %                                 |   |
| 35 phr CB (N134) <sup>9</sup>    | 0.8 phr    | 26 %                                   | 20 %                                 |   |

Note: commercially viable, a: SUMILINK@100; b: SUMILINK@200

**Table S4** Element analysis results of S<sub>3</sub>CA<sub>7</sub>, S<sub>5</sub>CA<sub>5</sub>, and S<sub>7</sub>CA<sub>3</sub>.

|                                | S (%) | C (%) | N (%) | H (%) |
|--------------------------------|-------|-------|-------|-------|
| S <sub>3</sub> CA <sub>7</sub> | 15.5  | 71.2  | 6.6   | 6.6   |
| S <sub>5</sub> CA <sub>5</sub> | 42.7  | 48.1  | 4.8   | 4.4   |
| S <sub>7</sub> CA <sub>3</sub> | 62.8  | 30.7  | 2.8   | 2.6   |

## References

- [1] B. Guo, Y. Lei, F. Chen, M. Du and D. Jia, *Appl. Surf. Sci.*, 2008, **225**, 2715-2722.
- [2] S. Morita, H. Shinzawa, I. Noda, and Y. Ozaki, *Appl. Spectrosc.*, 2006, **60**, 398-406.
- [3] S. Fang, S. Yu, S. Wu, J. Wang, Z. Tang and B. Guo, *Compos. Sci. Technol.*, 2022, **225**, 109482.
- [4] J. Wang, S. Wu, S. Fang, S. Yu, Z. Tang, B. Guo and L. Zhang, *Compos. Commun.*, 2024, **50**, 102002.
- [5] O. Ozturk, R&D Report, "SUMITOMO KAGAKU", 2016, **3**. <https://www.sumitomo-chem.co.jp/english/rd/report/2016/>

- [6] G. Zhang, Y. Jiang, S. Wang and Y. Zhang, *Compos. Pt. B-Eng*, 2023, **255**, 110614.
- [7] J. Gao, Y. Xing, L. An, X. Ye, H. Yao, H. Wang, X. Wu and L. Zhang, *Polym. Compos.*, 2023, **44**, 7997-8009.
- [8] J. Liu, H. Bi, X. Wang, W. Wang and B. Zhong, *Surf. Interf.*, 2025, **62**, 106246.
- [9] Z. Zhang, Y. Luan, C. Han, S. Wu and Y. Wu, *Langmuir*, 2025, **41**, 2796-2805.
